# Supplementary material for: Methylation and copy number profiling: emerging tools to differentiate osteoblastoma from malignant mimics?
Source: PubMed Central journal article supplement (PMC9424109; doi:10.1038/s41379-022-01071-1), 2022-03-28

## **SUPPLEMENTARY MATERIALS**

**Supplementary Figure S1** : Clustering of several bone-producing tumor types based on their methylation profile and colored according to the amplification of *MDM2*.

**Supplementary Table S1**: Clinical features and metadata of all samples investigated.

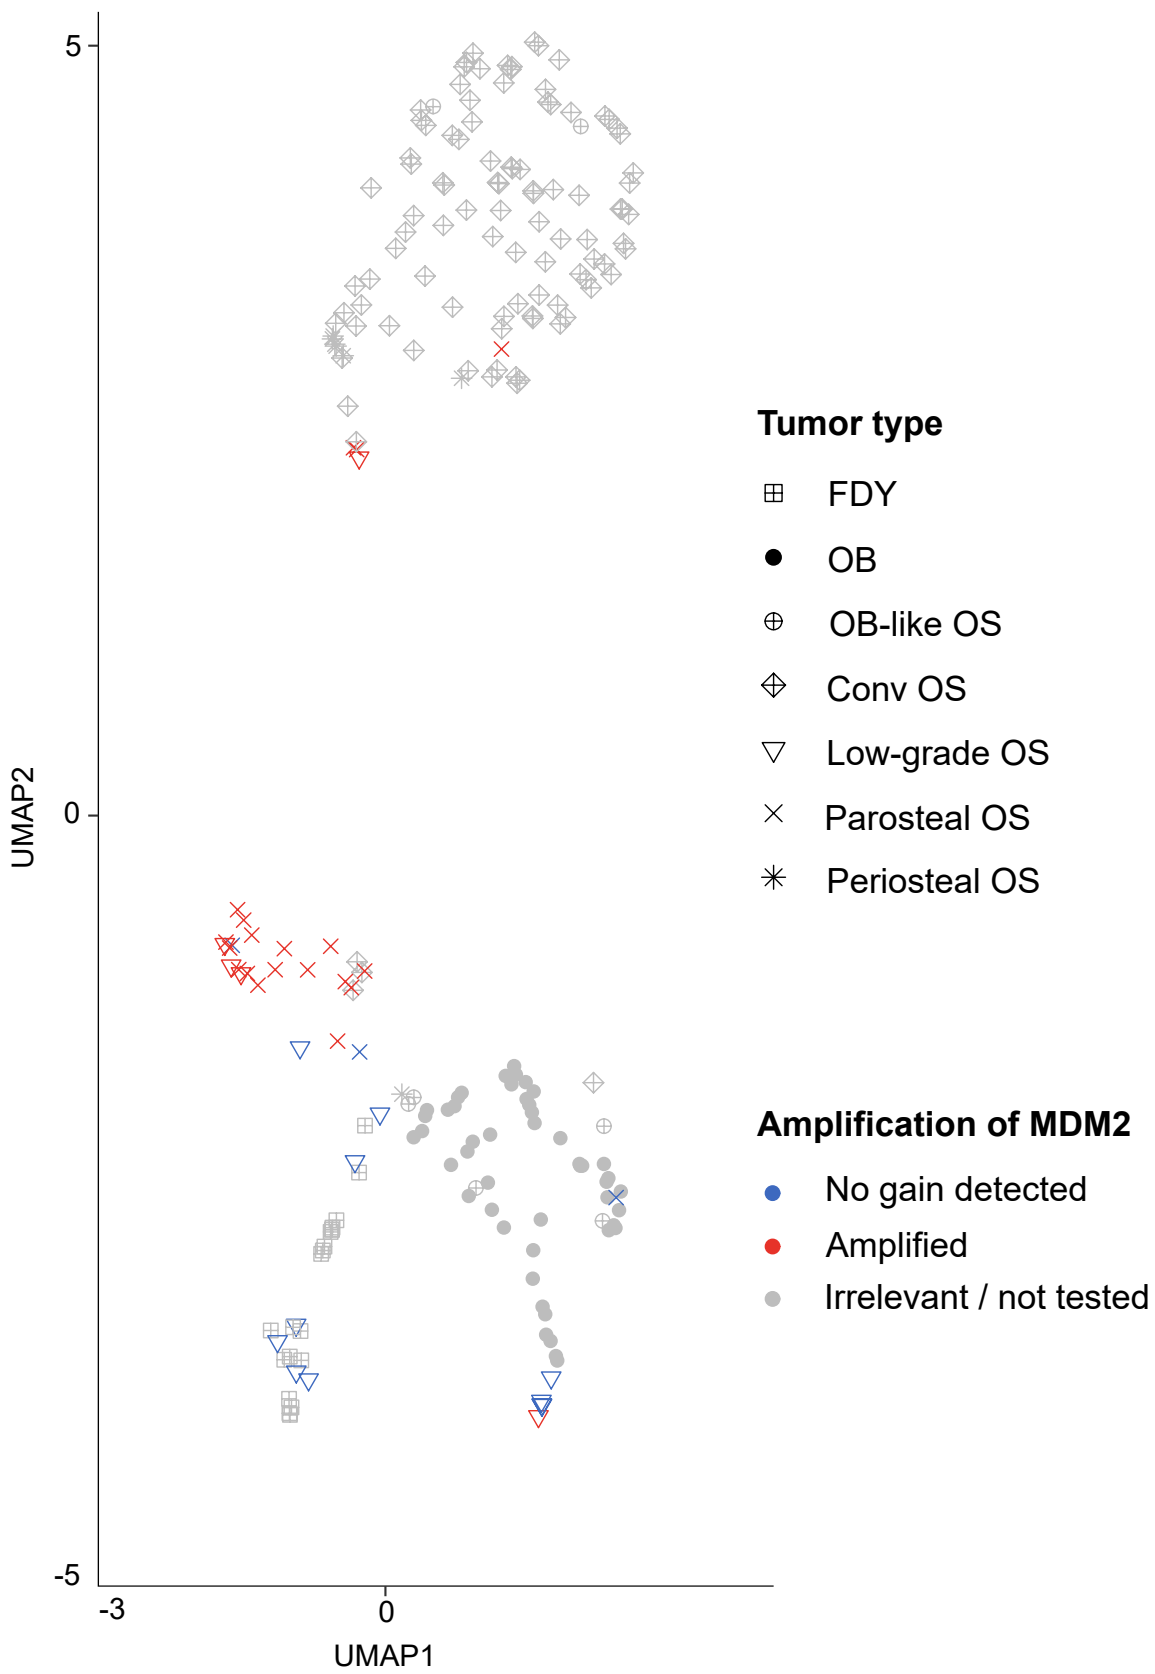

Supplement: 41379_2022_1071_MOESM1_ESM.pdf [file 41379_2022_1071_MOESM1_ESM.pdf]
